# Supplementary material
Source: MDPI journal article supplement (https://www.mdpi.com/2313-4321/1/3/343)
Supplement: s1 [file s1]

# Supplementary Materials: Challenges in Automotive Fuel Cells Recycling

Rikka Wittstock, Alexandra Pehlken and Michael Wark

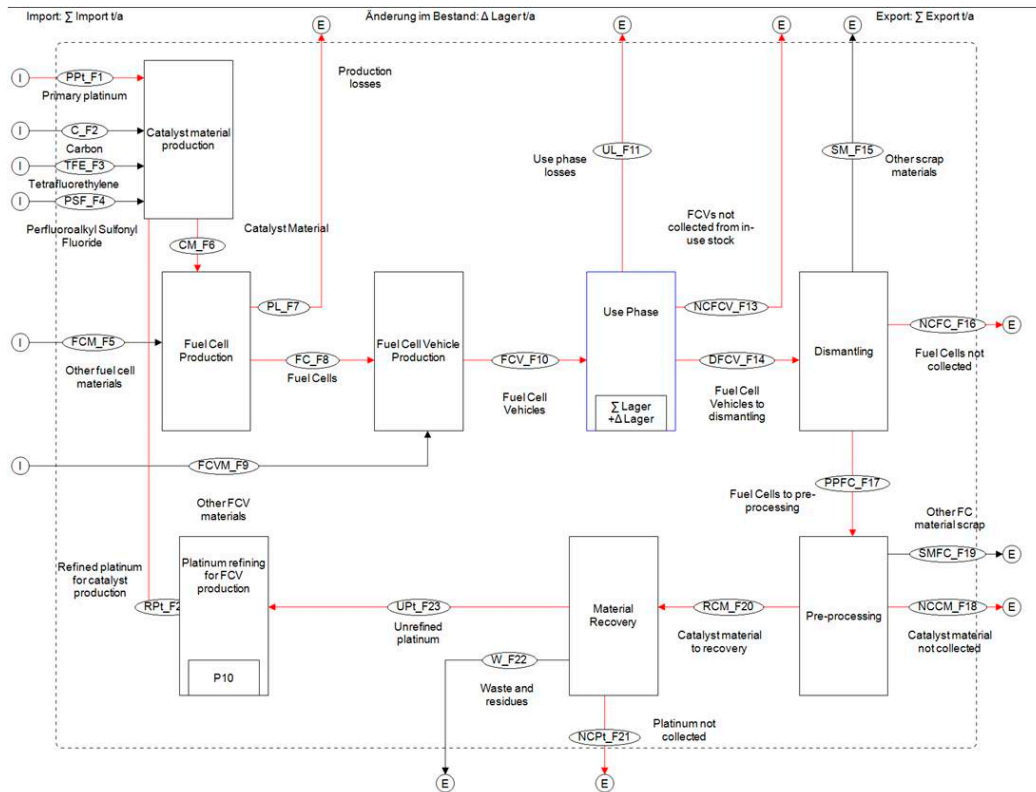

Figure S1. STAN material flow diagram including flow codes.

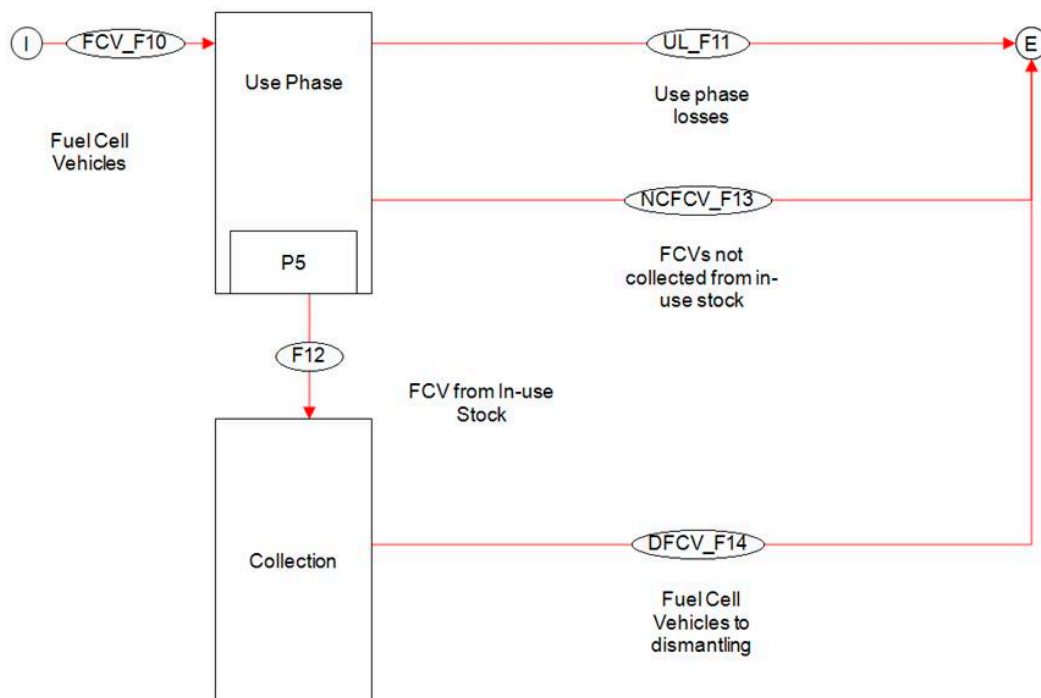

Figure S2. STAN use phase sub-system of the material flow diagram including flow codes.
